# Supplementary material for: Lung Adenocarcinoma Diagnosed at a Younger Age Is Associated with Advanced Stage, Female Sex, and Ever-Smoker Status, in Patients Treated with Lung Resection
Source: MDPI journal article supplement (doi:10.3390/cancers15082395), 2023-04-21
Supplement: s1 [file s1]

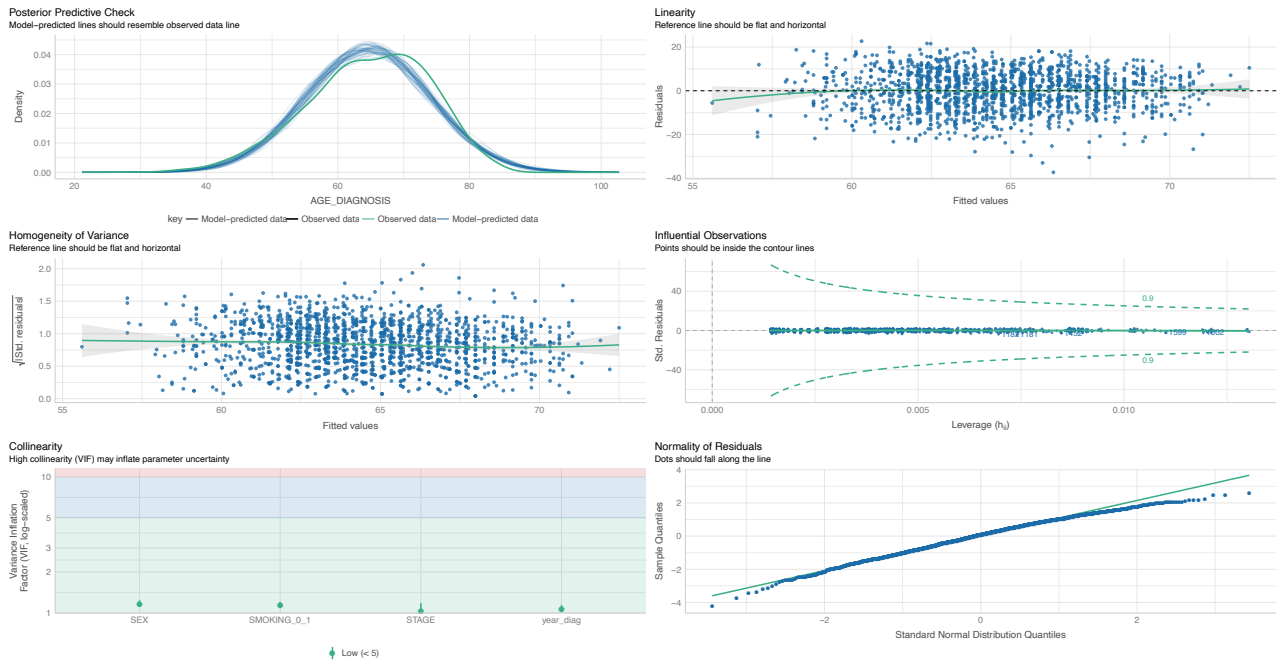

**Supplementary Figure S1.** Assessment of linear model assumptions in the discovery series with `check_model` function of Performance package in R. No multicollinearity was observed, but non-linear distribution of residuals and heteroscedasticity were detected.

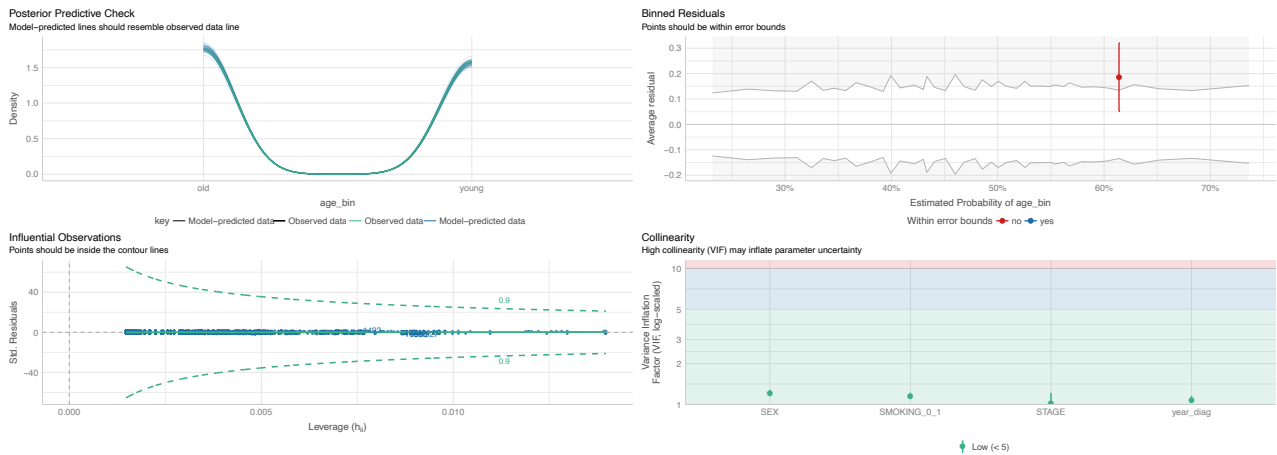

**Supplementary Figure S2.** Assessment of logistic model assumptions in the discovery series with `check_model` function of Performance package in R. No multicollinearity was observed; about 92% of the binned residuals are inside the error bounds. Additionally, no outliers were detected with Cook's method (threshold = 0.89).

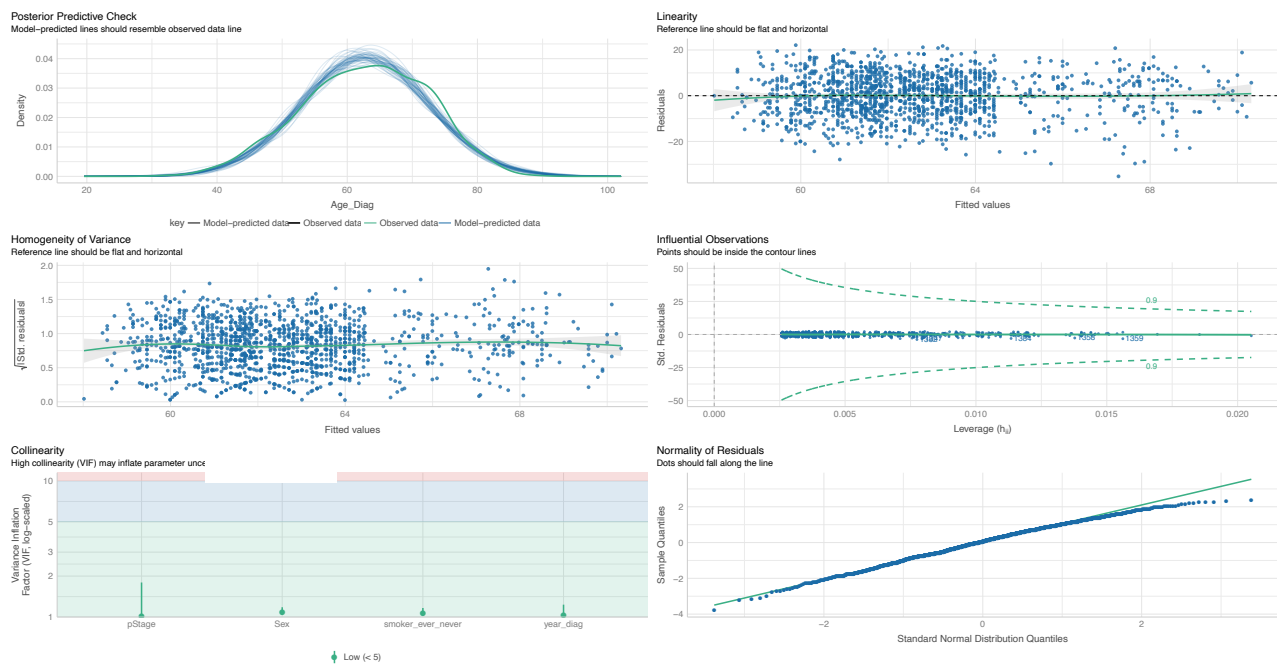

**Supplementary Figure S3.** Assessment of linear model assumptions in the validation series with `check_model` function of Performance package in R. No multicollinearity or heteroscedasticity was observed, but non-linear distribution of residuals was detected.

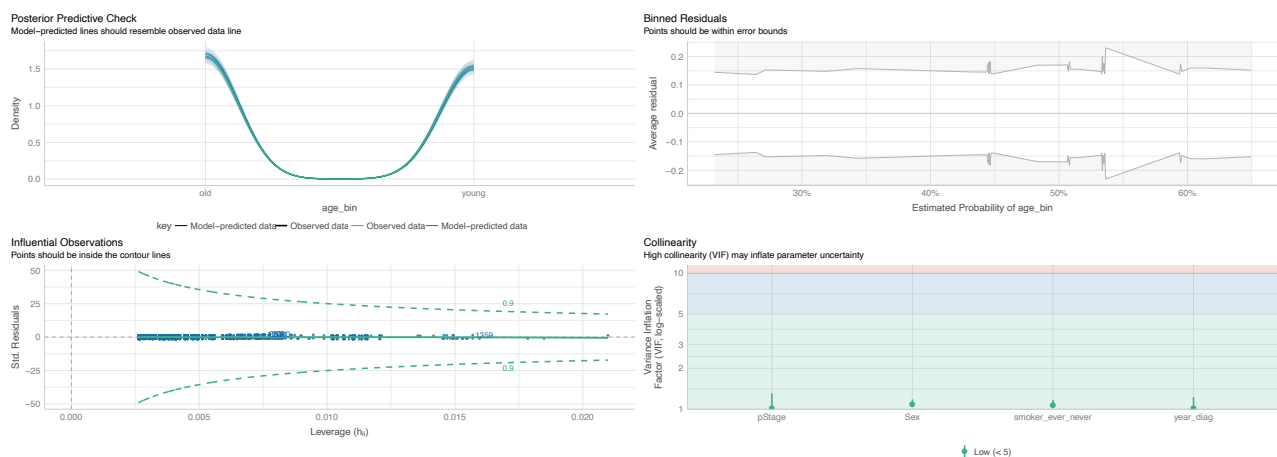

**Supplementary Figure S4.** Assessment of logistic model assumptions in the validation series with `check_model` function of Performance package in R. No multicollinearity was observed; about 100% of the binned residuals are inside the error bounds. Additionally, no outliers were detected with Cook's method (threshold = 0.89).
